# Supplementary material for: Redefining PH Domain Function: An Active Allosteric Mechanism in ASAP1-Mediated Arf1 GTP Hydrolysis
Source: Research Square preprint supplement (doi:10.21203/rs.3.rs-6702895/v1), 2025-05-23
Supplement: Supplementary file 1 [file e909a050a968141e6ad271a8.pdf]

FIG. SI1

A

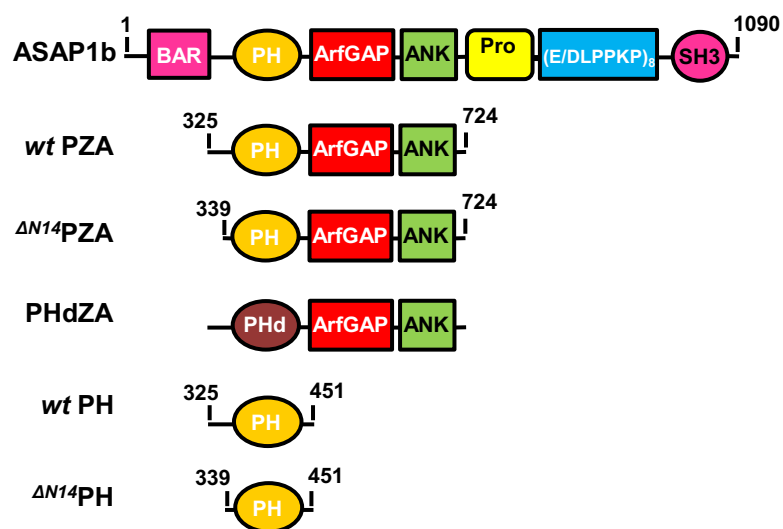

B

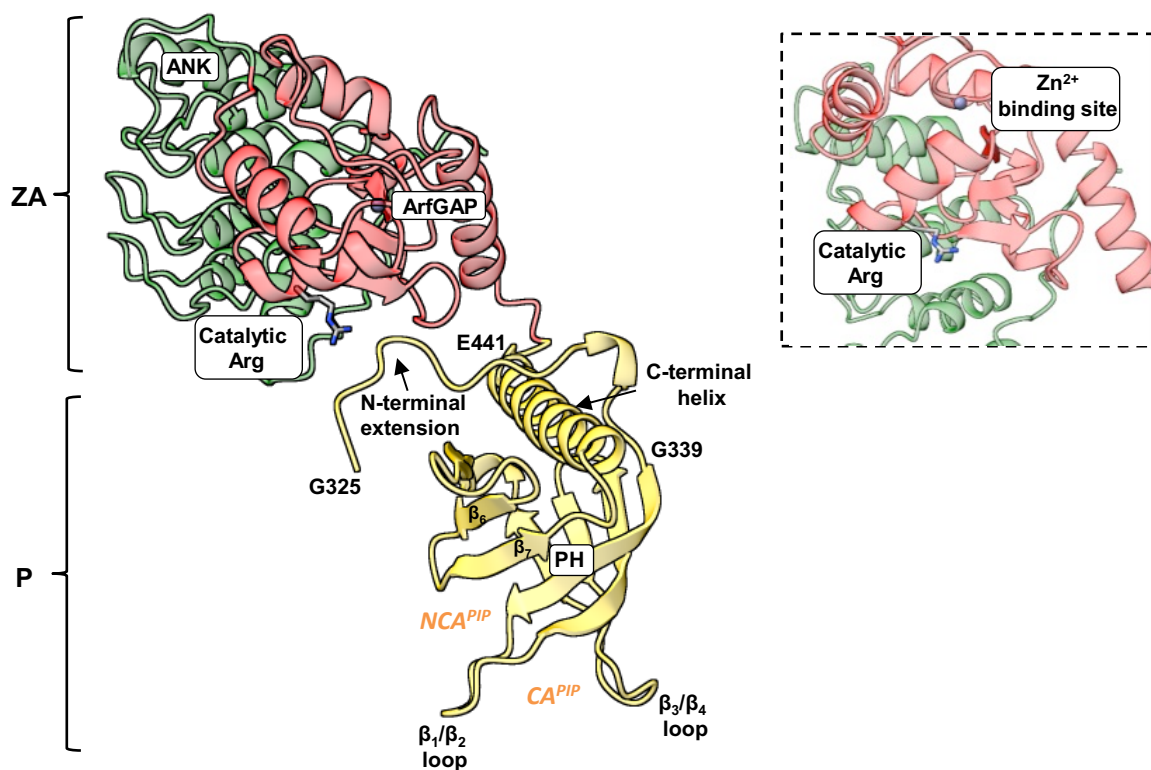

Fig. SI1. (A) Schematic of recombinant proteins used in this paper. The domain structure of

ASAP1 is shown in the schematic at top. Abbreviations: BAR, Bin/amphiphysin/RVS; PH, pleckstrin homology; Arf GAP, Arf GTPase-activating protein; ANK, ankyrin repeat; Pro-Rich, proline-rich; (E/DLPPKP)<sub>8</sub>, tandem repeats of E/DLPPKP; SH3, Src homology 3. Recombinant proteins used in the studies are shown below the schematic of full-length ASAP1. The acronyms for the proteins include “P” for the PH domain, “Z” for the Arf GAP domain, which is a zinc-binding motif, “A” for the ankyrin repeat and “PHd” for the PH domain of phospholipase C $\delta$ 1. PHdZA is a chimeric protein consisting of residues 1 to 134 of PLC $\delta$ 1 and residues 441 to 724 of ASAP1 **(B)** Ribbon representation of the AlphaFold structure of *wt* PZA. The PH (in yellow) and ZA (in red/green) domains behaves like “beads-on-a-string”<sup>57</sup>. Inset: Ribbon representation of the structure of ASAP1–PH in PDB: 5C79. PH domains are defined by a structural fold of 7  $\beta$ -strands arranged as a sandwich and capped by a C-terminal amphipathic  $\alpha$ -helix with loops of different lengths connecting the  $\beta$ -strands. For visual guidance,  $\beta$  strands 5-7, as well as loops linking the  $\beta$  strands and C-terminal helix are labeled. Residues 442-451 (unstructured) are not shown for clarity. Approximate sites of PI(4,5)P<sub>2</sub> interaction are labeled CA (for canonical sites) and NCA (for noncanonical site).

**FIG. SI2**

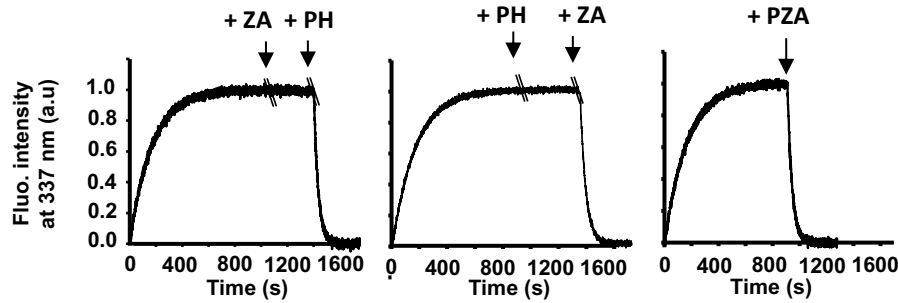

**Fig. SI2.** Representative tryptophan fluorescence kinetics trace of GTP hydrolysis of myr-Arf1 after GDP/GTP exchange triggered by the addition of PH and ArfGAP-Ankyrin repeat domains either isolated or in tandem. **Left:** Isolated PH domain ( $5\mu\text{M}$ ) was added to myrArf1·GTP ( $5\mu\text{M}$ ) bound to ND for  $\sim 500$  s before addition of ZA domain ( $25\mu\text{M}$ ). **Middle:** Isolated ZA domain ( $25\mu\text{M}$ ) was added to myrArf1·GTP ( $5\mu\text{M}$ ) for  $\sim 600$  s before addition of PH domain ( $5\mu\text{M}$ ). **Right:** *wt* PZA domain ( $10\text{ nM}$ ) was added to myrArf1·GTP ( $5\mu\text{M}$ ) when GDP/GTP exchange was complete ( $800$  s). Nucleotide exchange Arf·GDP ( $5\mu\text{M}$ ) was triggered by the addition of  $2\text{ mM}$  EDTA in the presence of  $20\mu\text{M}$  GTP, at  $22^\circ\text{C}$  in the presence of ND containing  $0.5\text{ mM}$  of accessible lipids.

**FIG. SI3**

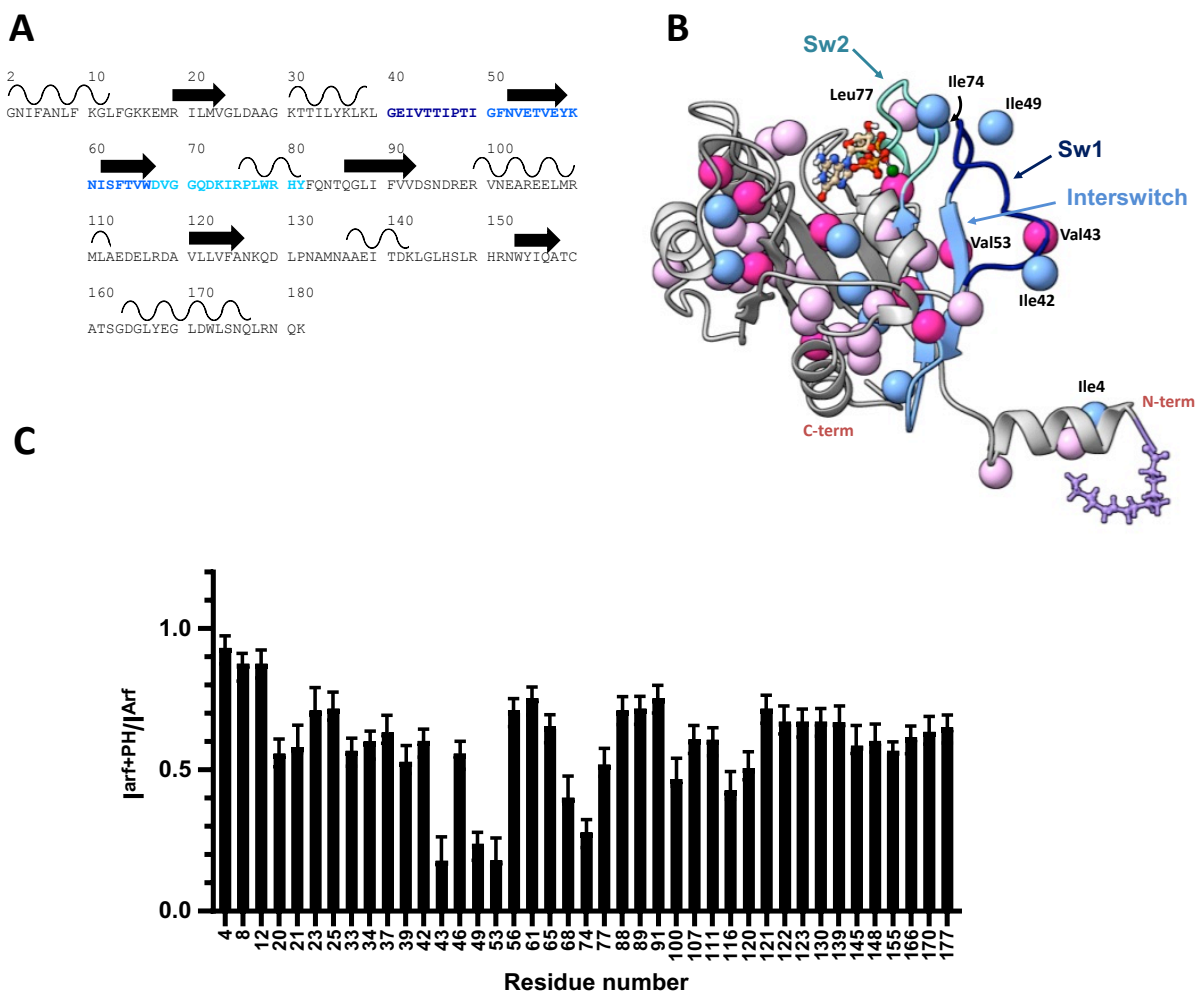

**Fig. SI3. (A)** Amino acid sequence and secondary structure elements of Arf1. Switch 1 (dark blue), switch 2 (cyan) and the IS (corn blue) are highlighted. **(B)** Homology model of human myr-Arf1, generated based on yeast Arf1 (PDB:2KSQ) using MODELLER, is shown in grey ribbon format. Switch 1 (dark blue), switch 2 (cyan) and the interswitch (light blue) and methyl-containing residues are highlighted: 11 isoleucines (blue), 22 leucines (light pink), and 11 valines (dark pink). The myristoyl chain (purple) is shown as a ball and stick representation. Residues 2–13 form the N-terminal helix (embedded in the nanodisc), and residues 17–181 constitute the G-domain (solvent-exposed). For leucine and valine residues, only the Pro-S methyl carbons are shown.

Images created using Chimera. (C) Attenuation of Arf methyl resonances upon complex formation. Ratio of cross peak intensity  $I^{\text{Arf+PH}} / I^{\text{Arf}}$  observed for methyl residues with ( $I^{\text{Arf+PH}}$ ) and without ( $I^{\text{Arf}}$ ) PH domain. When in complex with *wt* ASAP1 PH, loss of rotational freedom leads to an average resonance attenuation of  $0.65 \pm 0.07$ . Additional selective resonance attenuation observed for residues 43 and 49 of switch 1, 53 of the interswitch and 68 and 74 of switch 2 reflect residues at the interface.

FIG. S14

A

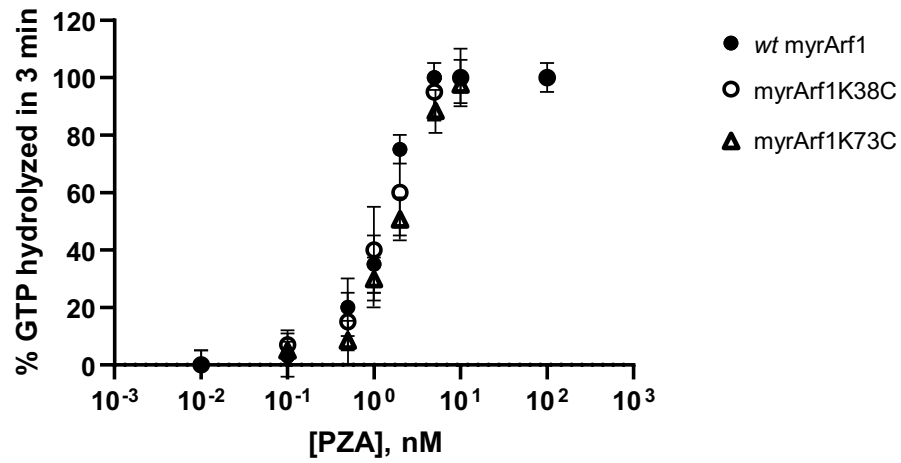

B

Spin label at position 38

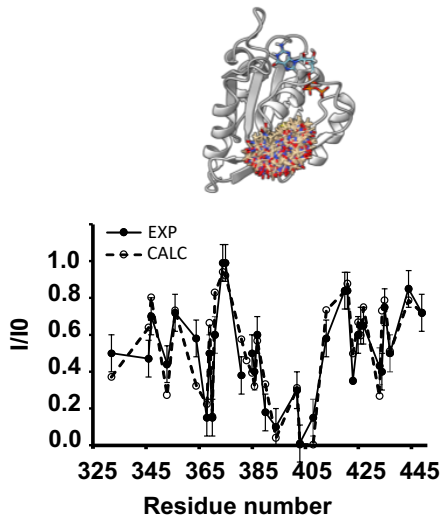

Spin label at position 73

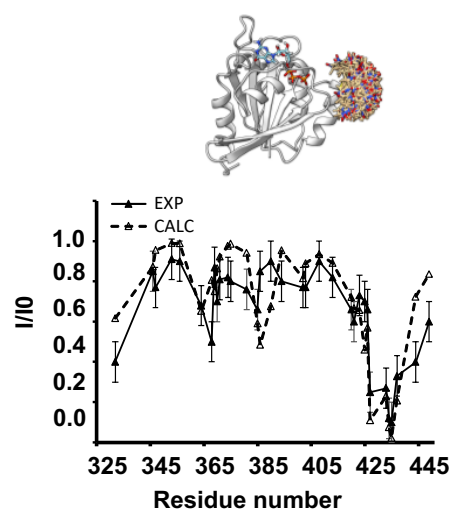

C

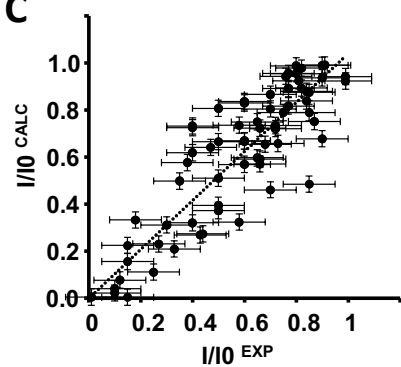

**Fig. SI4. (A)** Functional activity of myrArf1, myrArf1K73C or myrArf1K38C. *wt* PZA was titrated into a reaction containing 5  $\mu$ M myrArf1·GTP, myrArf1K73C·GTP or myrArf1K38C·GTP as a substrate. The percentage of GTP bound to myr-Arf1 hydrolyzed in 3 min is plotted against *wt* PZA concentration. **(B) left.** Position of MTSL label (brown) on myrArfK38C (in grey). For simplicity, residue 2-17 were omitted. Motion of the label is indicated by the multiple positions depicted. Intermolecular PRE profile measured on  $^{13}\text{C}$  methyl labeled ASAP1 PH in the presence of MTSL-tagged myrArf1K38C at the membrane surface. **right.** Position of MTSL label (brown) on myrArfK73C (in grey). For simplicity, Arf is represented without residue 2-17. Intermolecular PRE profile measured on  $^{13}\text{C}$  methyl labeled ASAP1 PH in the presence of MTSL-tagged myrArf1K38C at the membrane surface. Two independent experiments were performed. Data are presented as mean values. Error bars were calculated based on the signal-to-noise (S/N) ratio of the spectra as described in Methods. **(C)** Correlation of calculated PRE (y-axis) versus measured PRE (x-axis) corresponding to **(B)**. For the measured PRE, error bars were calculated based on the spectral signal-to-noise ratio as described in Methods. For the calculated PRE (y-axis), data are presented as mean values over all MD simulations replicas  $\pm$ SD.

FIG. S15

A

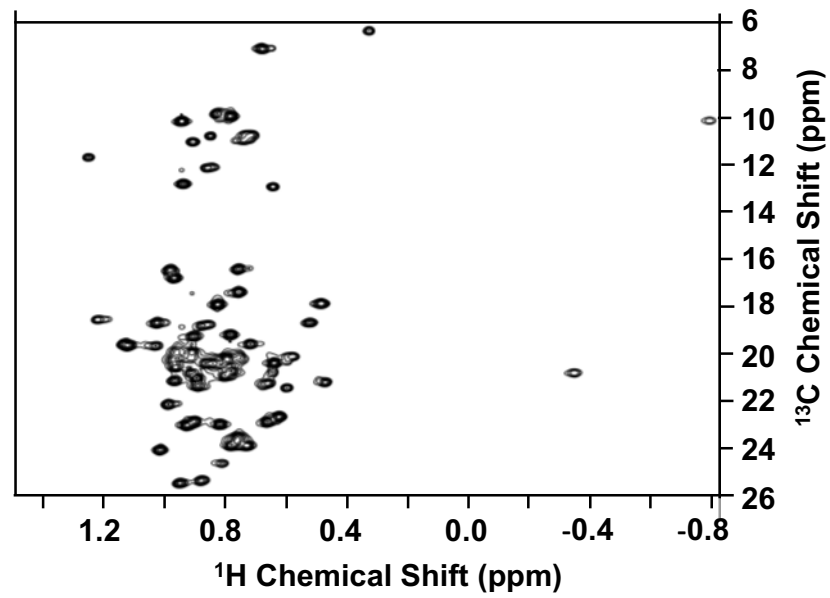

B

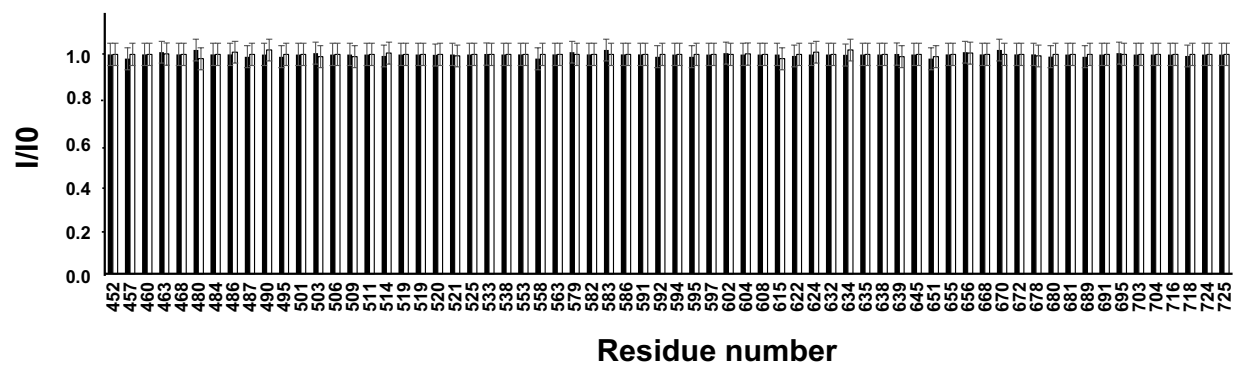



**Fig. SI5. (A)**  $^1\text{H}$ - $^{13}\text{C}$  HMQC of  $\text{U-}^2\text{H}$ ,  $^{15}\text{N}$  and  $\delta 1$ - $^{13}\text{C}$  $^1\text{H}$ -labeled Ile,  $\delta 1$ - $^{13}\text{C}$  $^1\text{H}$ -labeled Leu and  $\gamma 1$ - $^{13}\text{C}$  $^1\text{H}$ -labeled Val ZA domain (100  $\mu\text{M}$ ) in the presence of MTSL-tagged myrArf1C159 (100 $\mu\text{M}$ ) bound to equimolar ratio of ASAP1 PH at the membrane surface. **(B)** Intermolecular PRE ratio measured on ZA in the presence of MTSL-tagged myrArf1C159 alone (black column) or bound to equimolar ratio of ASAP1 PH (open column) at the membrane surface. No significant PRE could be detected.

FIG. SI6

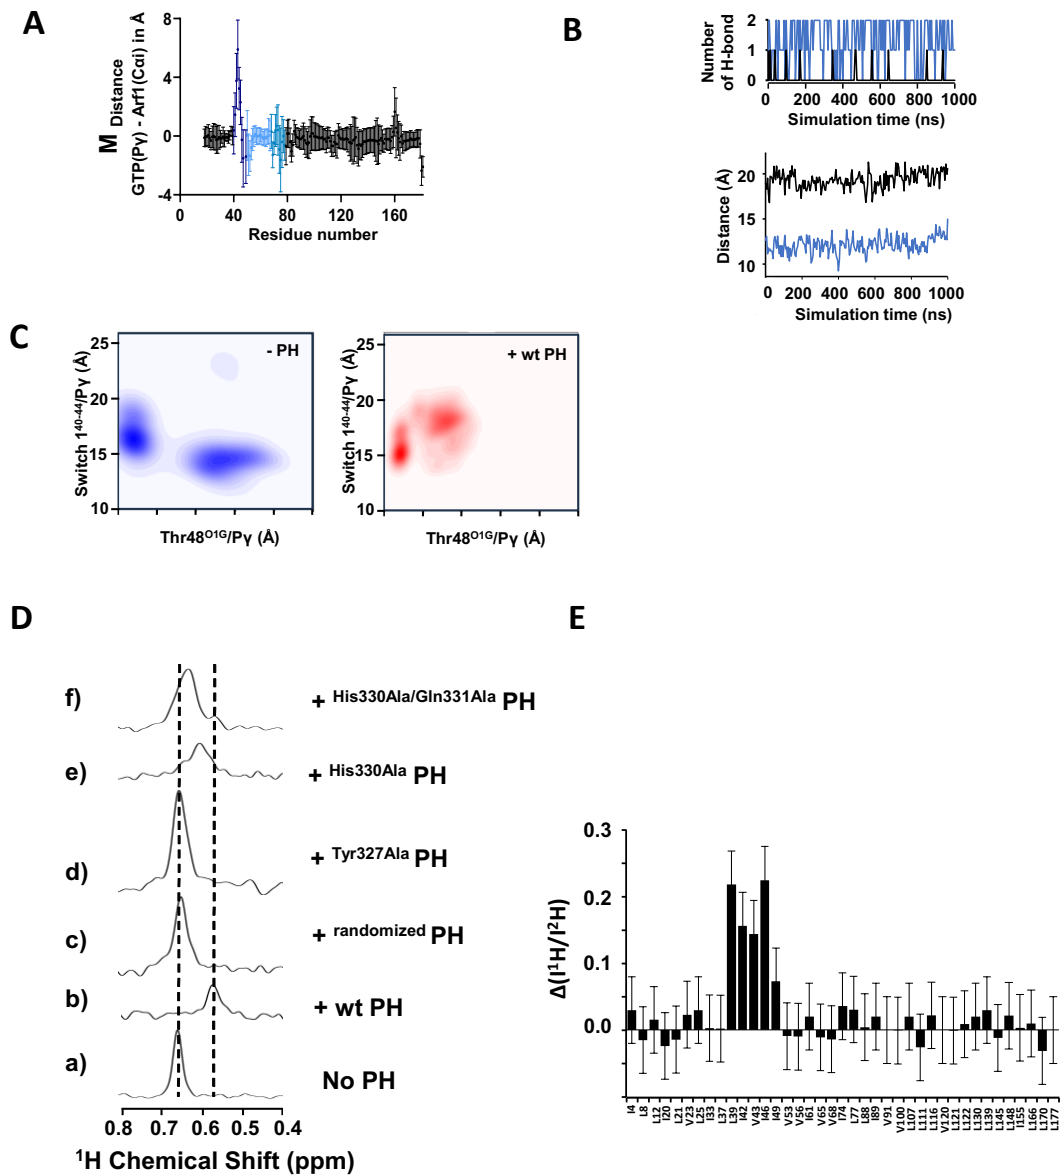

**Fig. SI6. (A)** Plot of the average distance difference calculated between GTP-Py atom of GTP and carbon alpha (CA) of each Arf1 residue calculated as  $(d^{\text{GTP-Py} \rightarrow \text{Ca}_i}(\text{Arf:wt PH}) - d^{\text{GTP-Py} \rightarrow \text{Ca}_i}(\text{Arf}))$ . Switch 1 (residues 40-49, dark blue), switch 2 (residues 68-78, cyan) and the interswitch (residues 50-67, light blue) are highlighted. Error bars are calculated as the sum of the SD. **(B) (top)** Time dependence of the number of H-bonds formed between Glu54 and Thr44

for Arf alone (blue) or for Arf in complex with *wt* PH (black). Only one of the replicas is shown as an example **(bottom)**. Time dependence of the distance between the center of mass (COM) of residue 39-45 of switch 1 and GTP- $P\gamma$  corresponding to the replica shown. **(C)** Correlation between the COM of switch 1<sup>40-44</sup>:GTP- $P\gamma$  and Thr48:Mg<sup>2+</sup> distances for Arf only (blue) and Arf+ *wt* PH (red) **(D)** Stack of rows extracted from a <sup>1</sup>H-<sup>13</sup>C HMQC experiment along the proton dimension of Val43 (myrArf1) in the absence (a) or in the presence of *wt*-ASAP1 PH (b),  $\Delta N^{14}$ ASAP1 PH (c) or  $\Delta N^9$ ASAP1 PH (d). **(E)** Difference  $\Delta I$  between the ratio of intensities of Arf1 <sup>1</sup>H-<sup>13</sup>C methyl cross peaks measured in the presence of <sup>1</sup>H ASAP1 PH and <sup>2</sup>H ASAP1 PH using *wt*- ASAP1 PH or  $\Delta N^{14}$ ASAP1 PH plotted against residue number.  $\Delta I$  is calculated as  $(I^{1H- wt-PH}/I^{2H-wt-PH})/(I^{1H- \Delta N^{14}-PH}/I^{2H- \Delta N^{14}-PH})$ .

FIG. SI7

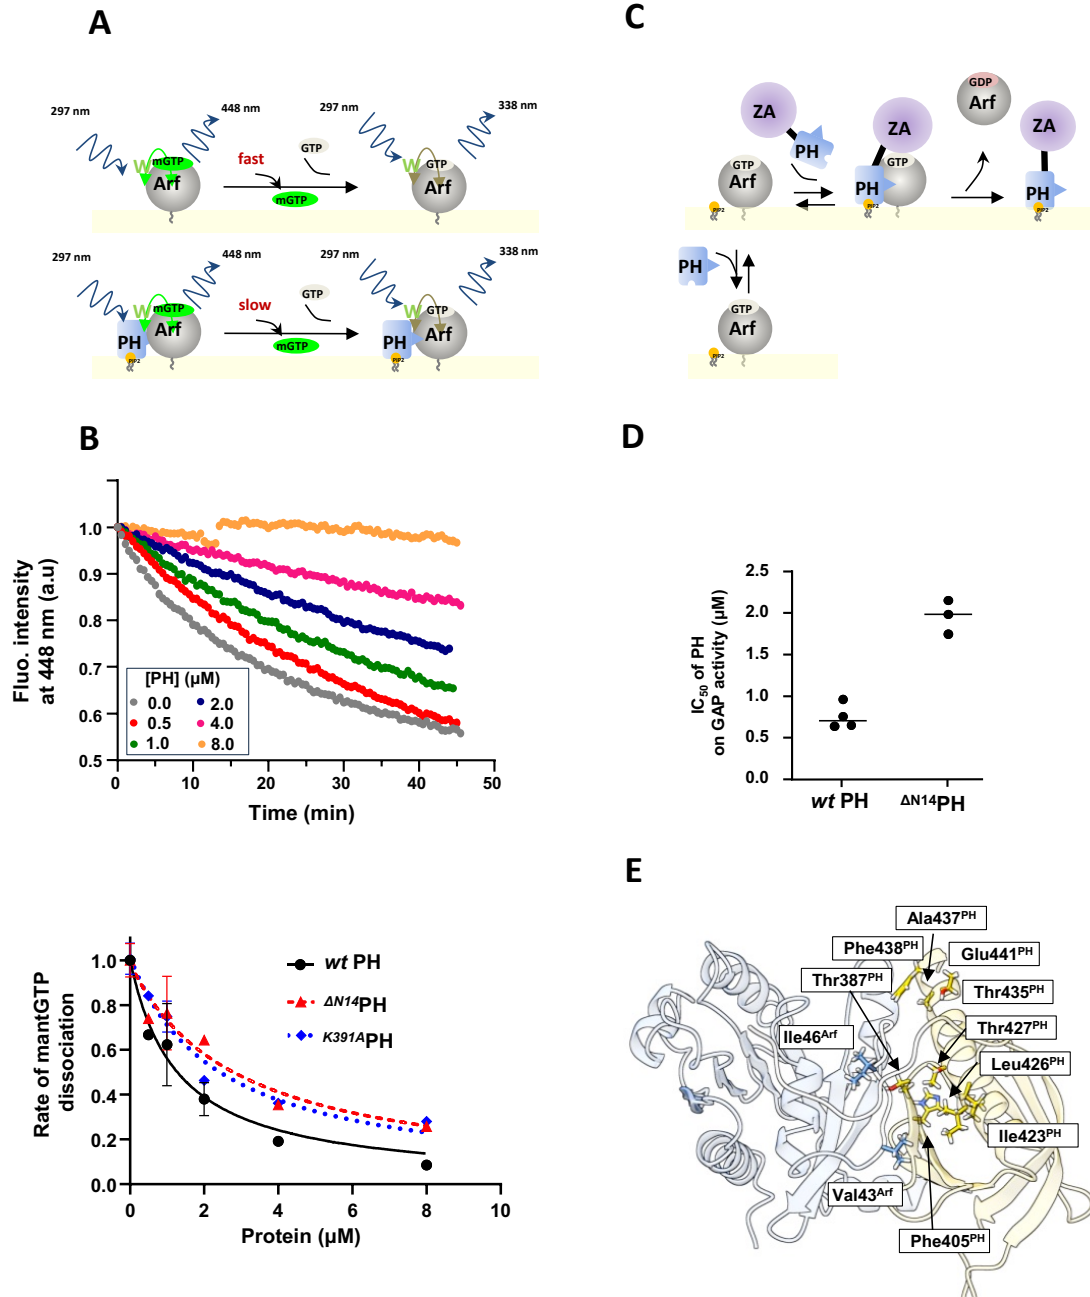

**Fig. SI7. (A)** Principle of FRET based assay used to measure  $K_d$  of PH for Arf1. MyrArf1 was loaded with the nucleotide analog mant-GTP, and the concentration of mant-GTP-bound Arf was followed by Fluorescence Resonance Energy Transfer (FRET) from myrArf1 tryptophan to mant-GTP. Then, *wt* PH or  $\Delta N14$ PH was titrated into the reaction containing an excess of GTP. Here, a

decrease in FRET indicates mant-GTP dissociation. If the dissociation rate is slower for myrArf1·GTP in complex with the PH domain than for uncomplexed myrArf1·GTP, the concentration of PH domain reducing the rate to ½ the maximum reduction in rate is then equal to the dissociation constant ( $K_d$ ). **(B) top:** Example of kinetic of FRET intensity measured at increasing concentration of PH domain. **bottom:** Dissociation rates of mantGTP as a function of PH domain concentration for *wt* PH (black circle),  $\Delta N14$ PH (red triangle) and  $K391A$ PH (blue diamond). The dissociation rates are normalized to the rate measured in the absence of PH domain ( $0.05 \text{ min}^{-1}$ ). **(C)** Principle of sequestration from GAP assay used to measure  $K_d$  of PH for Arf1. **(D)** Concentration of PH domain necessary to reduce by half GAP activity ( $IC_{50}$ ) in reactions containing myrArf1·GTP at concentrations less than the  $K_m$  for *wt* PZA ( $1.10^{-6} \text{ M}$ ) and  $1.10^{-9} \text{ M}$  *wt* PZA. Under these conditions, half-maximal inhibition occurs at approximately the  $K_d$ .  $IC_{50}$  values (the concentration of PH domain required to reduce GTP hydrolysis by ½ in 3 min) from each independent experiment are shown. Error bars represent standard deviation. \*\*\*\*,  $p < 0.0001$  via one-way ANOVA with repeated measures (and mixed effects) and Dunnett's multiple comparisons test against WT. **(E)** Position of mutated residues on myrArf (blue) and ASAP1 PH (gold).

## TABLE SI1

| Protein              | C50 (in M)                           |                                    |
|----------------------|--------------------------------------|------------------------------------|
|                      | + PI(4,5)P <sub>2</sub>              | - PI(4,5)P <sub>2</sub>            |
| <i>wt</i> PZA        | $3.10^{-11} \pm 1.5.10^{-11}$<br>(7) | $1.10^{-6} \pm 1.6.10^{-6}$<br>(3) |
| $\Delta N14$ PZA     | $3.10^{-9} \pm 1.8.10^{-9}$<br>(3)   | ND                                 |
| PHdZA                | $3.10^{-7} \pm 1.7.10^{-7}$<br>(3)   | $> 1.10^{-3}$<br>(3)               |
| ZA                   | $> 0.12.10^{-3}$<br>(4)              | $> 0.12.10^{-3}$<br>(3)            |
| <i>wt</i> PH + ZA    | $4.1.10^{-6} \pm 0.3.10^{-6}$<br>(4) | ND                                 |
| $\Delta N14$ PH + ZA | $2.10^{-4} \pm 1.7.10^{-4}$<br>(4)   | ND                                 |

**Table**

**SI1.** Comparison of GAP activity using Arf1 as substrate in membranes with or without PI(4,5)P<sub>2</sub>.

The amount of GAP (in M) required to achieve 50% conversion of [ $\alpha^{32}$ P]GTP to [ $\alpha^{32}$ P]GDP in 3 min (C<sub>50</sub>) was estimated and is inversely proportional to enzymatic power. Data are expressed as mean values  $\pm$  SD with the number of repeats indicated between parentheses.

**TABLE SI2****Ambiguous interaction restraints used in the structure calculations of Clusters <sup>$\beta_5/\beta_7$</sup>** 

| <b>Protein</b> | <b>Active Residues</b>                      | <b>Passive Residues</b> |
|----------------|---------------------------------------------|-------------------------|
| myrArfl        | 20, 40, 47, 49, 52, 53, 77, 79, 84          | 51, 55                  |
| ASAP1 PH       | 387, 388, 389, 390, 408, 423, 434, 435, 437 | none                    |

**Ambiguous interaction restraints used in the structure calculations of Clusters <sup>$\beta_2/\beta_3$</sup>** 

| <b>Protein</b> | <b>Active Residues</b>             | <b>Passive Residues</b> |
|----------------|------------------------------------|-------------------------|
| myrArfl        | 20, 40, 47, 49, 52, 53, 77, 79, 84 | 51, 55                  |
| ASAP1 PH       | 368, 370                           | 364, 371                |

**Unambiguous Distance restraints from PRE measurements used in the structure calculation of Clusters <sup>$\beta_5/\beta_7$</sup>** 

| <b>Residue</b> | <b>Sy atom</b> | <b>Distance (Å)</b> |
|----------------|----------------|---------------------|
| Ile403         | K38C           | 1.8 - 16            |
| Thr408         | K38C           | 1.8 - 16            |
| Ala394         | K38C           | 1.8 - 16            |

**Unambiguous Distance restraints from PRE measurements used in the structure calculation of Clusters <sup>$\beta_2/\beta_3$</sup>** 

| <b>Residue</b> | <b>Sy atom</b> | <b>Distance (Å)</b> |
|----------------|----------------|---------------------|
| Ala363         | K38C           | 1.8 - 16            |
| Ile368         | K38C           | 1.8 - 16            |
| Thr370         | K38C           | 1.8 - 16            |

**TABLE SI3**

| <b>myrArf1<br/>protein</b> | <b>GAP assays</b>          |                        |
|----------------------------|----------------------------|------------------------|
|                            | <b>C<sub>50</sub> (nM)</b> | <b>Fold<br/>change</b> |
| <b>WT</b>                  | 0.036 ± 0.014<br>(7)       | 1                      |
| <b>E41A</b>                | 0.11 ± 0.02 (3)            | 3.2                    |
| <b>I46A</b>                | 48 ± 2 (3)                 | 1337                   |
| <b>V43A</b>                | 0.25 ± 0.04 (4)            | 6.9                    |
| <b>E54A</b>                | 2.57 ± 0.32 (3)            | 72                     |

**Table SI3.** Comparison of GAP activity for myrArf1 mutants measured in LUV containing 5 mol% of PI(4,5)P<sub>2</sub>. The amount of GAP (in nM) required to achieve 50% conversion of [ $\alpha^{32}$ P]GTP to [ $\alpha^{32}$ P]GDP in 3 min (C<sub>50</sub>) was estimated. Data are expressed as mean values ± SD with the number of repeats indicated between parentheses.



**TABLE SI4**

| <b>ASAP1<br/>PZA</b> | <b>GAP assays</b>          |                        |
|----------------------|----------------------------|------------------------|
|                      | <b>C<sub>50</sub> (nM)</b> | <b>Fold<br/>change</b> |
| <b>WT</b>            | 0.036 ± 0.014<br>(7)       | 1                      |
| <b>T387L</b>         | 0.021 ± 0.005<br>(4)       | 0.6                    |
| <b>K391A</b>         | 3.58 ± 1.055 (4)           | 99.8                   |
| <b>H405E</b>         | 0.154 ± 0.069<br>(6)       | 4.3                    |
| <b>F438A</b>         | 0.564 ± 0.28 (4)           | 15.7                   |
| <b>E441A</b>         | 0.023± 0.005<br>(4)        | 1.2                    |
| <b>E441R</b>         | 0.045± 0.008<br>(4)        | 0.6                    |

**Table SI4.** Comparison of GAP activity for PZA mutants measured in LUV containing 5 mol% of PI(4,5)P<sub>2</sub>. The amount of GAP (in nM) required to achieve 50% conversion of [ $\alpha^{32}$ P]GTP to [ $\alpha^{32}$ P]GDP in 3 min (C<sub>50</sub>) was estimated. Data are expressed as mean values ± SD with the number of repeats indicated between parentheses.

**TABLE SI5**

| <b>ASAP1<br/>PZA</b> | <b>GAP assays</b>          |                        |
|----------------------|----------------------------|------------------------|
|                      | <b>C<sub>50</sub> (nM)</b> | <b>Fold<br/>change</b> |
| <b>WT*</b>           | 0.36 ± 0.14 (7)            | 1                      |
| <b>I423A*</b>        | 0.756 ± 0.17 (3)           | 2.1                    |
| <b>L426A*</b>        | 1.86 ± 0.23 (3)            | 5.19                   |
| <b>T427A*</b>        | 0.154 ± 0.1 (3)            | 0.43                   |
| <b>T435A*</b>        | 0.129 ± 0.1 (3)            | 0.36                   |
| <b>A437R*</b>        | 1.303± 0.1 (3)             | 3.62                   |

**Table SI5.** Comparison of GAP activity for PZA mutants measured in LUVs at 1 mol% PI(4,5)P<sup>2</sup>. The amount of GAP (in nM) required to achieve 50% conversion of [ $\alpha^{32}$ P]GTP to [ $\alpha^{32}$ P]GDP in 3 min (C<sub>50</sub>) was estimated. Data are expressed as mean values ± SD with the number of repeats indicated between parentheses. Asterisk indicated determination was made with 1 mol% PIP2 in the LUVs. All other experiments with LUVs included 5 mol% PIP2.

## KINETIC MODELING

### “In Trans” Reaction Network

Our model reaction network for the in trans experiments tracks the concentrations of 18 species in total. The 5 fundamental species are PH, ZA, Arf·GTP, PS, and PIP<sub>2</sub>. Arf complexes formed through various bimolecular association reactions are Arf·GTP, PH•Arf·GTP, PH•Arf·GTP•ZA. Since the PH domain can bind to both PS and PIP<sub>2</sub>, we also have distinct PS•PH, PIP<sub>2</sub>•PH and PS•PIP<sub>2</sub>•PH species. We therefore also must track the 6 corresponding variations of the two PH•Arf complexes. Finally, there is the product Arf·GDP formed through GTP hydrolysis. The list of reactions, along with corresponding rate constants, is:

1.  $\text{PIP}_2 + \text{PH} \rightleftharpoons \text{PIP}_2 \bullet \text{PH} : k_{on/off}^{\text{PH+PIP}}$
2.  $\text{PS} + \text{PH} \rightleftharpoons \text{PS} \bullet \text{PH} : k_{on/off}^{\text{PH+PS}}$
3.  $\text{PIP}_2 + \text{PS} \bullet \text{PH} \rightleftharpoons \text{PS} \bullet \text{PIP}_2 \bullet \text{PH} : k_{on/off}^{\text{PH+PIP}} \text{ (2D)}$
4.  $\text{PS} + \text{PIP}_2 \bullet \text{PH} \rightleftharpoons \text{PS} \bullet \text{PIP}_2 \bullet \text{PH} : k_{on/off}^{\text{PH+PS}} \text{ (2D)}$
5.  $\text{PIP}_2 + \text{PH} \bullet \text{ArfGTP} \rightleftharpoons \text{PIP}_2 \bullet \text{PH} \bullet \text{ArfGTP} : k_{on/off}^{\text{PH+PIP}} \text{ (2D)}$
6.  $\text{PS} + \text{PH} \bullet \text{ArfGTP} \rightleftharpoons \text{PS} \bullet \text{PH} \bullet \text{ArfGTP} : k_{on/off}^{\text{PH+PS}} \text{ (2D)}$
7.  $\text{PIP}_2 + \text{PS} \bullet \text{PH} \bullet \text{ArfGTP} \rightleftharpoons \text{PS} \bullet \text{PIP}_2 \bullet \text{PH} \bullet \text{ArfGTP} : k_{on/off}^{\text{PH+PIP}} \text{ (2D)}$
8.  $\text{PS} + \text{PIP}_2 \bullet \text{PH} \bullet \text{ArfGTP} \rightleftharpoons \text{PS} \bullet \text{PIP}_2 \bullet \text{PH} \bullet \text{ArfGTP} : k_{on/off}^{\text{PH+PS}} \text{ (2D)}$
9.  $\text{PIP}_2 + \text{PH} \bullet \text{ArfGTP} \bullet \text{ZA} \rightleftharpoons \text{PIP}_2 \bullet \text{PH} \bullet \text{ArfGTP} \bullet \text{ZA} : k_{on/off}^{\text{PH+PIP}} \text{ (2D)}$
10.  $\text{PS} + \text{PH} \bullet \text{ArfGTP} \bullet \text{ZA} \rightleftharpoons \text{PS} \bullet \text{PH} \bullet \text{ArfGTP} \bullet \text{ZA} : k_{on/off}^{\text{PH+PS}} \text{ (2D)}$
11.  $\text{PIP}_2 + \text{PS} \bullet \text{PH} \bullet \text{ArfGTP} \bullet \text{ZA} \rightleftharpoons \text{PS} \bullet \text{PIP}_2 \bullet \text{PH} \bullet \text{ArfGTP} \bullet \text{ZA} : k_{on/off}^{\text{PH+PIP}} \text{ (2D)}$
12.  $\text{PS} + \text{PIP}_2 \bullet \text{PH} \bullet \text{ArfGTP} \bullet \text{ZA} \rightleftharpoons \text{PS} \bullet \text{PIP}_2 \bullet \text{PH} \bullet \text{ArfGTP} \bullet \text{ZA} : k_{on/off}^{\text{PH+PS}} \text{ (2D)}$

13.  $\text{ArfGTP} + \text{PH} \rightleftharpoons \text{PH} \cdot \text{ArfGTP} : k_{on/off}^{\text{Arf+PH}}$
14.  $\text{ArfGTP} + \text{PS} \cdot \text{PH} \rightleftharpoons \text{PS} \cdot \text{PH} \cdot \text{ArfGTP} : k_{on/off}^{\text{Arf+PH}} (2\text{D})$
15.  $\text{ArfGTP} + \text{PIP}_2 \cdot \text{PH} \rightleftharpoons \text{PIP}_2 \cdot \text{PH} \cdot \text{ArfGTP} : k_{on/off}^{\text{Arf+PH}} (2\text{D})$
16.  $\text{ArfGTP} + \text{PS} \cdot \text{PIP}_2 \cdot \text{PH} \rightleftharpoons \text{PS} \cdot \text{PIP}_2 \cdot \text{PH} \cdot \text{ArfGTP} : k_{on/off}^{\text{Arf+PH}} (2\text{D})$
17.  $\text{ArfGTP} \cdot \text{ZA} + \text{PH} \rightleftharpoons \text{PH} \cdot \text{ArfGTP} \cdot \text{ZA} : k_{on/off}^{\text{Arf+PH}}$
18.  $\text{ArfGTP} \cdot \text{ZA} + \text{PS} \cdot \text{PH} \rightleftharpoons \text{PS} \cdot \text{PH} \cdot \text{ArfGTP} \cdot \text{ZA} : k_{on/off}^{\text{Arf+PH}} (2\text{D})$
19.  $\text{ArfGTP} \cdot \text{ZA} + \text{PIP}_2 \cdot \text{PH} \rightleftharpoons \text{PIP}_2 \cdot \text{PH} \cdot \text{ArfGTP} \cdot \text{ZA} : k_{on/off}^{\text{Arf+PH}} (2\text{D})$
20.  $\text{ArfGTP} \cdot \text{ZA} + \text{PS} \cdot \text{PIP}_2 \cdot \text{PH} \rightleftharpoons \text{PS} \cdot \text{PIP}_2 \cdot \text{PH} \cdot \text{ArfGTP} \cdot \text{ZA} : k_{on/off}^{\text{Arf+PH}} (2\text{D})$
21.  $\text{ArfGTP} + \text{ZA} \rightleftharpoons \text{ArfGTP} \cdot \text{ZA} : k_{on/off}^{\text{Arf+ZA}}$
22.  $\text{PH} \cdot \text{ArfGTP} + \text{ZA} \rightleftharpoons \text{PH} \cdot \text{ArfGTP} \cdot \text{ZA} : k_{on/off}^{\text{Arf+ZA}}$
23.  $\text{PS} \cdot \text{PH} \cdot \text{ArfGTP} + \text{ZA} \rightleftharpoons \text{PS} \cdot \text{PH} \cdot \text{ArfGTP} \cdot \text{ZA} : k_{on/off}^{\text{Arf+ZA}}$
24.  $\text{PIP}_2 \cdot \text{PH} \cdot \text{ArfGTP} + \text{ZA} \rightleftharpoons \text{PIP}_2 \cdot \text{PH} \cdot \text{ArfGTP} \cdot \text{ZA} : k_{on/off}^{\text{Arf+ZA}}$
25.  $\text{PS} \cdot \text{PIP}_2 \cdot \text{PH} \cdot \text{ArfGTP} + \text{ZA} \rightleftharpoons \text{PS} \cdot \text{PIP}_2 \cdot \text{PH} \cdot \text{ArfGTP} \cdot \text{ZA} : k_{on/off}^{\text{Arf+ZA}}$
26.  $\text{ArfGTP} \cdot \text{ZA} \rightarrow \text{ArfGDP} + \text{ZA} : k_{cat}^{\text{Arf.ZA}}$
27.  $\text{PH} \cdot \text{ArfGTP} \cdot \text{ZA} \rightarrow \text{ArfGDP} + \text{PH} + \text{ZA} : k_{cat}^{\text{PH.Ar.f.ZA}}$
28.  $\text{PS} \cdot \text{PH} \cdot \text{ArfGTP} \cdot \text{ZA} \rightarrow \text{ArfGDP} + \text{PS} \cdot \text{PH} + \text{ZA} : k_{cat}^{\text{PH.Ar.f.ZA}}$
29.  $\text{PIP}_2 \cdot \text{PH} \cdot \text{ArfGTP} \cdot \text{ZA} \rightarrow \text{ArfGDP} + \text{PIP}_2 \cdot \text{PH} + \text{ZA} : k_{cat}^{\text{PH.Ar.f.ZA}}$
30.  $\text{PS} \cdot \text{PIP}_2 \cdot \text{PH} \cdot \text{ArfGTP} \cdot \text{ZA} \rightarrow \text{ArfGDP} + \text{PS} \cdot \text{PIP}_2 \cdot \text{PH} + \text{ZA} : k_{cat}^{\text{PH.Ar.f.ZA}}$

Arf·GTP is assumed to reside entirely on the membrane due to its N-terminal myristoylation. Rates followed by “(2D)” indicate reactions which occur on the two-dimensional membrane surface. The

association rates for 2D reactions (dimensions  $area^{-1}time^{-1}$ ) are related to their 3D counterparts (dimensions  $volume^{-1}time^{-1}$ ) by dividing by a nanoscopic length scale  $h$  which phenomenologically accounts for thermodynamic effects of surface binding.  $h$  is typically comparable to the molecular length scale, i.e., of order nanometers [5]. Since in our ODE system we track all species based on volume concentration, the effective macroscopic association rates (dimensions  $volume^{-1}time^{-1}$ ) for 2D reactions used in these equations are multiplied by a unitless *dimensionality factor*  $DF = V/Ah$ , where  $V$  is the solution volume and  $A$  is the total membrane area. Critically, the  $k_{cat}$  rate is allowed to change based on the presence of PH in complex with Arf. A simplifying assumption made in this model is that the rates of association/dissociation for PH to Arf are independent of whether or not lipids are bound. Additionally, the association of PH to the membrane via PIP<sub>2</sub> and PS binding is modeled in both cases as a single bimolecular association reaction.

### Tandem network

The tandem PZA reaction network is qualitatively different from the “in trans” system due to the presence of the linker between the PH and ZA subunits. After the binding of either the PH or ZA subunit to Arf, the subsequent binding of the other subunit becomes a first-order reaction rather than second-order. We introduce rates for these “loop-closure” reactions in the following way:

The dissociation constants for the individual subunits binding to Arf can be expressed as

$$K_d^{Arf+ZA} = \frac{k_{off}^{Arf+ZA}}{k_{on}^{Arf+ZA}} = c_0 e^{\Delta G_{ZA}/k_B T} \quad K_d^{Arf+PH} = \frac{k_{off}^{Arf+PH}}{k_{on}^{Arf+PH}} = c_0 e^{\Delta G_{PH}/k_B T}$$

where the  $k_{on/off}$  rates are the same as those in the reactions above,  $\Delta G_{ZA/PH}$  is the change in Gibbs free energy upon ZA/PH binding, and  $c_0$  is the standard state concentration 1 M. The affinity of PZA for Arf can be expressed as

$$K_d^{Arf+PZA} = c_0 e^{(\Delta G_{ZA} + \Delta G_{PH} + \Delta G_{coop})/k_B T}$$

where  $\Delta G_{coop}$  is a cooperative contribution to the free energy of binding for PH and ZA to Arf due to the linker connecting them. Substituting the expressions above for  $\Delta G_{ZA/PH}$  in terms of rates, we arrive at

$$K_d^{\text{Arf+PZA}} = \frac{k_{off}^{\text{Arf+ZA}} k_{off}^{\text{Arf+PH}}}{c_0 k_{on}^{\text{Arf+ZA}} k_{on}^{\text{Arf+PH}}} e^{\Delta G_{\text{coop}}/k_B T}.$$

Considering the case where PH binds first and rearranging this expression we find,

$$K_d^{\text{Arf+PZA}} = \frac{k_{off}^{\text{Arf+PH}}}{k_{on}^{\text{Arf+PH}}} \frac{k_{off}^{\text{Arf+ZA}}}{c_0 k_{on}^{\text{Arf+ZA}} e^{-\Delta G_{\text{coop}}/k_B T}}.$$

So, assuming that the off-rate  $k_{off}^{\text{Arf+ZA}}$  is unchanged, we can straightforwardly read off the first-order binding rate for ZA to “close the loop” to Arf after PH is already bound:  $k_{close}^{\text{Arf+ZA}} = c_0 k_{on}^{\text{Arf+ZA}} e^{-\Delta G_{\text{coop}}/k_B T}$ . Rearranging the terms produces the analogous expression for PH loop-closure. The reactions which use these rates are highlighted with an asterisk (\*) in the list below. That the off-rate remains the same is a reasonable simplifying assumption that we make here; however, this can be relaxed at the cost of introducing a new parameter determining what fraction of  $c_0 e^{-\Delta G_{\text{coop}}/k_B T}$  is attributed to the on vs. off rate.

Although these reactions all have the wild type tandem PZA unit, we still use the notation of PH and ZA for PZA in complex with Arf in order to track which subunit is bound. For example, the species  $\text{PH} \bullet \text{ArfGTP}$  represents PZA in complex with Arf wherein the PH domain is bound to Arf, but the ZA domain is not. In the following list, the notation  $\text{ZA}_{\text{PIP}}$ ,  $\text{ZA}_{\text{PS}}$ , and  $\text{ZA}_{\text{PS,PIP}}$  are used to track the PH lipid binding state for species in which only the ZA domain is bound to Arf.

1.  $\text{PIP}_2 + \text{PZA} \rightleftharpoons \text{PIP}_2 \bullet \text{PZA} : k_{on/off}^{\text{PH+PIP}}$
2.  $\text{PS} + \text{PZA} \rightleftharpoons \text{PS} \bullet \text{PZA} : k_{on/off}^{\text{PH+PS}}$
3.  $\text{PIP}_2 + \text{PS} \bullet \text{PZA} \rightleftharpoons \text{PS} \bullet \text{PIP}_2 \bullet \text{PZA} : k_{on/off}^{\text{PH+PIP}} \text{ (2D)}$
4.  $\text{PS} + \text{PIP}_2 \bullet \text{PZA} \rightleftharpoons \text{PS} \bullet \text{PIP}_2 \bullet \text{PZA} : k_{on/off}^{\text{PH+PS}} \text{ (2D)}$
5.  $\text{PIP}_2 + \text{PH} \bullet \text{ArfGTP} \rightleftharpoons \text{PIP}_2 \bullet \text{PH} \bullet \text{ArfGTP} : k_{on/off}^{\text{PH+PIP}} \text{ (2D)}$
6.  $\text{PS} + \text{PH} \bullet \text{ArfGTP} \rightleftharpoons \text{PS} \bullet \text{PH} \bullet \text{ArfGTP} : k_{on/off}^{\text{PH+PS}} \text{ (2D)}$
7.  $\text{PIP}_2 + \text{PS} \bullet \text{PH} \bullet \text{ArfGTP} \rightleftharpoons \text{PS} \bullet \text{PIP}_2 \bullet \text{PH} \bullet \text{ArfGTP} : k_{on/off}^{\text{PH+PIP}} \text{ (2D)}$

$$8. \text{PS} + \text{PIP}_2 \bullet \text{PH} \bullet \text{ArfGTP} \rightleftharpoons \text{PS} \bullet \text{PIP}_2 \bullet \text{PH} \bullet \text{ArfGTP} : k_{on/off}^{\text{PH+PS}} \text{ (2D)}$$

$$9. \text{PIP}_2 + \text{PH} \bullet \text{ArfGTP} \bullet \text{ZA} \rightleftharpoons \text{PIP}_2 \bullet \text{PH} \bullet \text{ArfGTP} \bullet \text{ZA} : k_{on/off}^{\text{PH+PIP}} \text{ (2D)}$$

$$10. \text{PS} + \text{PH} \bullet \text{ArfGTP} \bullet \text{ZA} \rightleftharpoons \text{PS} \bullet \text{PH} \bullet \text{ArfGTP} \bullet \text{ZA} : k_{on/off}^{\text{PH+PS}} \text{ (2D)}$$

$$11. \text{PIP}_2 + \text{PS} \bullet \text{PH} \bullet \text{ArfGTP} \bullet \text{ZA} \rightleftharpoons \text{PS} \bullet \text{PIP}_2 \bullet \text{PH} \bullet \text{ArfGTP} \bullet \text{ZA} : k_{on/off}^{\text{PH+PIP}} \text{ (2D)}$$

$$12. \text{PS} + \text{PIP}_2 \bullet \text{PH} \bullet \text{ArfGTP} \bullet \text{ZA} \rightleftharpoons \text{PS} \bullet \text{PIP}_2 \bullet \text{PH} \bullet \text{ArfGTP} \bullet \text{ZA} : k_{on/off}^{\text{PH+PS}} \text{ (2D)}$$

$$13. \text{PIP}_2 + \text{ArfGTP} \bullet \text{ZA} \rightleftharpoons \text{PH} \bullet \text{ArfGTP} \bullet \text{ZA}_{\text{PIP}} : k_{on/off}^{\text{PH+PIP}} \text{ (2D)}$$

$$14. \text{PS} + \text{ArfGTP} \bullet \text{ZA} \rightleftharpoons \text{ArfGTP} \bullet \text{ZA}_{\text{PS}} : k_{on/off}^{\text{PH+PS}} \text{ (2D)}$$

$$15. \text{PIP}_2 + \text{ArfGTP} \bullet \text{ZA}_{\text{PS}} \rightleftharpoons \text{ArfGTP} \bullet \text{ZA}_{\text{PS,PIP}} : k_{on/off}^{\text{PH+PIP}} \text{ (2D)}$$

$$16. \text{PS} + \text{ArfGTP} \bullet \text{ZA} \rightleftharpoons \text{PH} \bullet \text{ArfGTP} \bullet \text{ZA}_{\text{PS,PIP}} : k_{on/off}^{\text{PH+PS}} \text{ (2D)}$$

$$17. \text{ArfGTP} + \text{PZA} \rightleftharpoons \text{PH} \bullet \text{ArfGTP} : k_{on/off}^{\text{Arf+PH}}$$

$$18. \text{ArfGTP} + \text{PS} \bullet \text{PZA} \rightleftharpoons \text{PS} \bullet \text{PH} \bullet \text{ArfGTP} : k_{on/off}^{\text{Arf+PH}} \text{ (2D)}$$

$$19. \text{ArfGTP} + \text{PIP}_2 \bullet \text{PZA} \rightleftharpoons \text{PIP}_2 \bullet \text{PH} \bullet \text{ArfGTP} : k_{on/off}^{\text{Arf+PH}} \text{ (2D)}$$

$$20. \text{ArfGTP} + \text{PS} \bullet \text{PIP}_2 \bullet \text{PH} \rightleftharpoons \text{PS} \bullet \text{PIP}_2 \bullet \text{PH} \bullet \text{ArfGTP} : k_{on/off}^{\text{Arf+PH}} \text{ (2D)}$$

$$21. \text{ArfGTP} + \text{PZA} \rightleftharpoons \text{ArfGTP} \bullet \text{ZA} : k_{on/off}^{\text{Arf+ZA}}$$

$$22. \text{ArfGTP} + \text{PIP}_2 \bullet \text{PZA} \rightleftharpoons \text{ArfGTP} \bullet \text{ZA}_{\text{PIP}} : k_{on/off}^{\text{Arf+ZA}} \text{ (2D)}$$

$$23. \text{ArfGTP} + \text{PS} \bullet \text{PZA} \rightleftharpoons \text{ArfGTP} \bullet \text{ZA}_{\text{PS}} : k_{on/off}^{\text{Arf+ZA}} \text{ (2D)}$$

$$24. \text{ArfGTP} + \text{PS} \bullet \text{PIP}_2 \bullet \text{PZA} \rightleftharpoons \text{ArfGTP} \bullet \text{ZA}_{\text{PS,PIP}} : k_{on/off}^{\text{Arf+ZA}} \text{ (2D)}$$

$$25. \text{PH} \bullet \text{ArfGTP} \rightleftharpoons \text{PH} \bullet \text{ArfGTP} \bullet \text{ZA} : k_{close/off}^{\text{Arf+ZA}} *$$

$$26. \text{PIP}_2 \bullet \text{PH} \bullet \text{ArfGTP} \rightleftharpoons \text{PIP}_2 \bullet \text{PH} \bullet \text{ArfGTP} \bullet \text{ZA} : k_{close/off}^{\text{Arf+ZA}} *$$

27.  $\text{PS} \bullet \text{PH} \bullet \text{ArfGTP} \rightleftharpoons \text{PS} \bullet \text{PH} \bullet \text{ArfGTP} \bullet \text{ZA} : k_{close/off}^{\text{Arf+ZA}} *$
28.  $\text{PS} \bullet \text{PIP}_2 \bullet \text{PH} \bullet \text{ArfGTP} \rightleftharpoons \text{PS} \bullet \text{PIP}_2 \bullet \text{PH} \bullet \text{ArfGTP} \bullet \text{ZA} : k_{close/off}^{\text{Arf+ZA}} *$
29.  $\text{ArfGTP} \bullet \text{ZA} \rightleftharpoons \text{PH} \bullet \text{ArfGTP} \bullet \text{ZA} : k_{close/off}^{\text{Arf+PH}} *$
30.  $\text{ArfGTP} \bullet \text{ZA}_{\text{PIP}} \rightleftharpoons \text{PIP}_2 \bullet \text{PH} \bullet \text{ArfGTP} \bullet \text{ZA} : k_{close/off}^{\text{Arf+PH}} *$
31.  $\text{ArfGTP} \bullet \text{ZA}_{\text{PS}} \rightleftharpoons \text{PS} \bullet \text{PH} \bullet \text{ArfGTP} \bullet \text{ZA} : k_{close/off}^{\text{Arf+PH}} *$
32.  $\text{ArfGTP} \bullet \text{ZA}_{\text{PS,PIP}} \rightleftharpoons \text{PS} \bullet \text{PIP}_2 \bullet \text{PH} \bullet \text{ArfGTP} \bullet \text{ZA} : k_{close/off}^{\text{Arf+PH}} *$
33.  $\text{ArfGTP} \bullet \text{ZA} \rightarrow \text{ArfGDP} + \text{ZA} : k_{cat}^{\text{Arf.ZA}}$
34.  $\text{ArfGTP} \bullet \text{ZA}_{\text{PIP}} \rightarrow \text{ArfGDP} + \text{PIP}_2 \bullet \text{PZA} : k_{cat}^{\text{Arf.ZA}}$
35.  $\text{ArfGTP} \bullet \text{ZA}_{\text{PS}} \rightarrow \text{ArfGDP} + \text{PS} \bullet \text{PZA} : k_{cat}^{\text{Arf.ZA}}$
36.  $\text{ArfGTP} \bullet \text{ZA}_{\text{PS,PIP}} \rightarrow \text{ArfGDP} + \text{PS} \bullet \text{PIP}_2 \bullet \text{PZA} : k_{cat}^{\text{Arf.ZA}}$
37.  $\text{PH} \bullet \text{ArfGTP} \bullet \text{ZA} \rightarrow \text{ArfGDP} + \text{PH} + \text{ZA} : k_{cat}^{\text{PZA.Arf}}$
38.  $\text{PS} \bullet \text{PH} \bullet \text{ArfGTP} \bullet \text{ZA} \rightarrow \text{ArfGDP} + \text{PS} \bullet \text{PH} + \text{ZA} : k_{cat}^{\text{PZA.Arf}}$
39.  $\text{PIP}_2 \bullet \text{PH} \bullet \text{ArfGTP} \bullet \text{ZA} \rightarrow \text{ArfGDP} + \text{PIP}_2 \bullet \text{PH} + \text{ZA} : k_{cat}^{\text{PZA.Arf}}$
40.  $\text{PS} \bullet \text{PIP}_2 \bullet \text{PH} \bullet \text{ArfGTP} \bullet \text{ZA} \rightarrow \text{ArfGDP} + \text{PS} \bullet \text{PIP}_2 \bullet \text{PH} + \text{ZA} : k_{cat}^{\text{PZA.Arf}}$

Two further assumptions have been made such that the reaction rates for this system are determined entirely in terms of the rates for the in trans reactions and the new parameter  $\Delta G_{\text{coop}}$ . First, as PS and PIP<sub>2</sub> binding occur on the PH domain, the rates for membrane association of PZA are taken equal to those for PH alone. Second, the catalytic rate  $k_{cat}^{\text{PZA.Arf}}$  is taken equal to the previously measured experimental value of approximately 56 s<sup>-1</sup> [7].

The simplified PHdZA model (green curves in Fig. SI8A) uses the same reaction network as PZA with modified kinetic parameters: PHd binding to Arf is disallowed, as PHd has negligible affinity for Arf, and therefore  $k_{cat}$  is assumed to be always equal to  $k_{cat}^{\text{Arf.ZA}}$ .



**FIG. SI8**

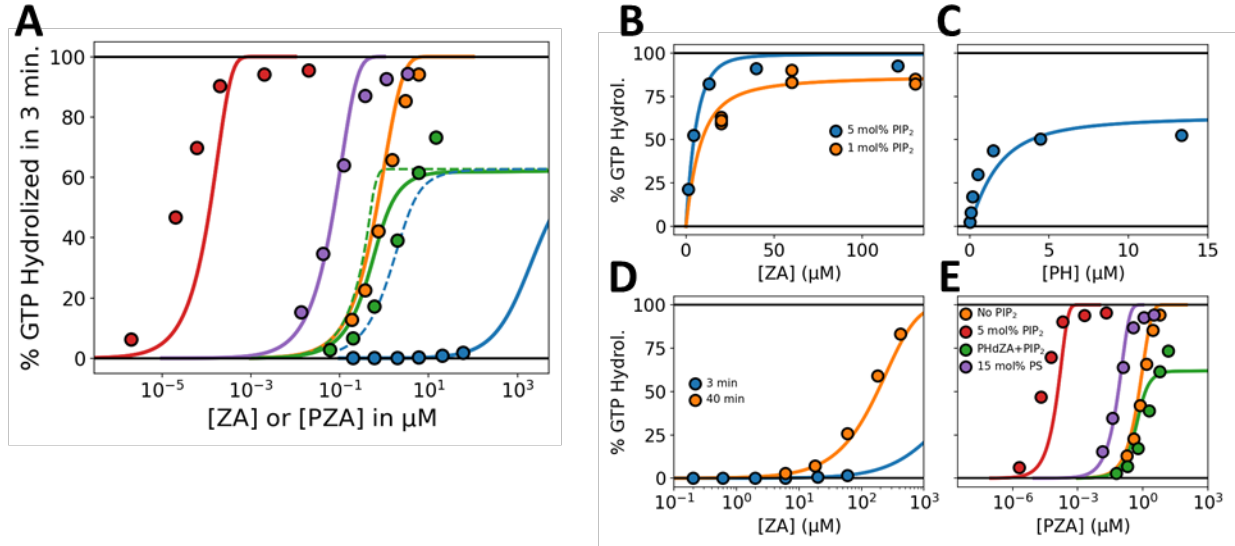

**Fig. SI8. Kinetic modeling of GAP activity.** (A) Fraction of GTP hydrolyzed in 3 minutes by either ZA or PZA. From right to left, solid curves are for ZA (blue), PHdZA with PI(4,5) $\text{P}_2$  and PS (green), PZA (orange), PZA with PS (purple), and PZA with both PS and PI(4,5) $\text{P}_2$  (red). Dashed curves are hypothetical PZA in which the sole PH function is substrate binding (blue dashed) and hypothetical PZA in which PH does not induce allosteric enhancement in  $k_{\text{cat}}$  (green dashed). Points represent experimental data and lines are predictions from optimized kinetic ODE model.

In all cases where PI(4,5)P<sub>2</sub> is present its concentration is 5 mol%, and similarly 15 mol% for PS. **(B–E)** Plots of experimental data (circles, triangles) used to optimize the kinetic model, along with model predictions (solid curves) for the final optimal parameter set. Initial Arf·GTP concentration is 1 μM in all cases. Unless indicated otherwise, PI(4,5)P<sub>2</sub> concentration is 5 mol%. Reaction time is 3 minutes except where otherwise indicated.

The model parameters are constrained by experimental GTP hydrolysis rates as determined in several different conditions for both in trans and tandem PZA, as well as PHdZA. For the in trans systems, these include data for fraction of GTP hydrolyzed in 3 minutes with a fixed concentration of PH and varying amount of ZA (Fig. SI8B), fixed concentration of ZA and varying PH (Fig. SI8C), and ZA alone with no PH present (Fig. SI8D). For tandem PZA, we use fraction of GTP hydrolyzed in the absence of PIP<sub>2</sub> and PS, with 15 mol% PS, and with 15 mol% PS and 5 mol% PIP<sub>2</sub> present (Fig. SI8E).

Fig. SI8A also presents two hypothetical scenarios generated using the optimal model parameters, shown as dashed curves. The blue dashed curve presents a tandem PZA scenario in which the sole function of the PH domain is substrate binding and does not bind to lipids nor induce allosteric changes to the catalytic rate. The green dashed curve adds lipid binding (PS and PIP<sub>2</sub>) to the situation just described. Together with the solid green curve (approximate model for PHdZA), these demonstrate that while dimensional reduction and substrate binding are each individually able to produce large enhancements in GAP activity compared to ZA alone, their combined effects (dashed green curve) are limited to roughly 4 order-of-magnitude enhancement. In addition, halving the affinity of the PH domain for Arf (simulating the difference in affinity between  $\Delta N^{14}$ PZA and *wt* PZA) in a model with recruitment and binding, but without conformational change in Arf resulted in a near negligible impact on overall GAP activity by PZA.

These results are consistent with the critical role of the intrinsically disordered region of the PH domain for GAP activity.

Our model parameters were optimized by minimizing the  $\chi^2$  residual between the simulation results and the observational data points, while imposing certain restrictions on the model parameters. In addition to the parameter limits given in Table SI7, the following constraints were imposed on dissociation constants  $K_d = k_{\text{off}}/k_{\text{on}}$  based on experimental measurements:  $K_d^{\text{PH+Arf}} \geq 10\mu\text{M}$ ,  $K_d^{\text{ZA+Arf}} \geq 100\mu\text{M}$ , and  $K_d^{\text{ZA+Arf}} > K_d^{\text{PH+Arf}}$ . Additionally, the following constraint was imposed on rate constants to avoid pathological results:  $k_{\text{cat}}^{\text{PH.Arf.ZA}} \geq k_{\text{cat}}^{\text{Arf.ZA}}$ . These restrictions, along with parameters which are held constant during fitting, are summarized in Table SI6.

In order to find optimal parameter combinations in the high-dimensional space, we performed stochastic global optimization via a genetic algorithm implemented in the Julia programming language using packages from the SciML ecosystem [1–4]. An initial population of 15000 sets of parameters (individual candidates in the evolutionary algorithm) is sampled uniformly in log-space from the allowable parameter ranges (Table SI7) and respecting the imposed constraints (Table SI6). The genetic algorithm then proceeds by iterating the following steps for 10 generations:

1. Generate an offspring population via crossover and mutation:
  - a. Adjacent candidate pairs have 50% probability of swapping parameters via 2-point crossover.
  - b. Each individual parameter within a candidate then has a 75% chance of being uniformly scaled by up to 50% in either direction (within the prescribed bounds).
  - c. Additionally, the 5 best individuals from the previous generation continue on unmodified.
2. Evaluate each candidate's fitness as the  $\chi^2$  residual between the numerical ODE result and the data in Fig. SI8B-E.

3. Select the next generation by tournament: 10% of the population is selected at random, and the individual with highest fitness is added to the next generation. This is repeated until the next generation has equal size.

This entire process was repeated several times and the best final set of parameters (lowest  $\chi^2$ ) over all runs was taken as the optimal parameter set; the values are given in Table SI7. The  $\chi^2$  value for the optimal parameters is roughly 28% lower than the  $\chi^2$  of the next-best local optimum found, distinguishing it rather strongly from other candidate parameter sets. This solution is plotted in Fig. 8 and Fig. SI8, and the parameter uncertainties are presented in Fig. SI9.

The large sample of initial candidate points followed by subsequent generations of stochastic updates allows the algorithm to sample many regions of the parameter space in order to avoid becoming trapped in an initial local minimum of the fitness landscape. However, the stochastic nature of the algorithm, combined with the rough nature of the high-dimensional fitness landscape, does mean that repeated optimization runs generally do not converge to identical sets of optimal parameters. Applying a deterministic minimization algorithm (such as downhill simplex) to the optimal candidate post-GA does not resolve this issue.

| <b>Fixed Parameters / Constraints</b> |                                           |
|---------------------------------------|-------------------------------------------|
| <b>Parameter</b>                      | <b>Value / Constraint</b>                 |
| $k_{cat}^{PZA.Arf}$                   | 56 s <sup>-1</sup> [7]                    |
| $K_d^{Arf+PH}$                        | $\geq 10 \mu\text{M}$                     |
| $K_d^{Arf+ZA}$                        | $\geq 100 \mu\text{M}; \geq K_d^{Arf+PH}$ |
| $k_{cat}^{PH.Arf.ZA}$                 | $\geq k_{cat}^{Arf.ZA}$                   |

**Table SI6.** Kinetic model parameters which are fixed or constrained.

| Variable Fit Parameters          |                                 |                  |                      |
|----------------------------------|---------------------------------|------------------|----------------------|
| Parameter                        | Units                           | Allowed Range    | Best Fit             |
| $k_{on}^{Arf+ZA}$                | $\mu\text{M}^{-1}\text{s}^{-1}$ | $10^{-8} — 10$   | 0.0056               |
| $k_{off}^{Arf+ZA}$               | $\text{s}^{-1}$                 | $10^{-3} — 10^5$ | 18                   |
| $k_{on}^{Arf+PH}$                | $\mu\text{M}^{-1}\text{s}^{-1}$ | $10^{-8} — 10$   | $6.5 \times 10^{-7}$ |
| $k_{off}^{Arf+PH}$               | $\text{s}^{-1}$                 | $10^{-3} — 10^5$ | 0.0012               |
| $k_{cat}^{Arf.ZA}$               | $\text{s}^{-1}$                 | $10^{-6} — 56$   | 0.0055               |
| $k_{cat}^{PH.Arf.ZA}$            | $\text{s}^{-1}$                 | $10^{-6} — 56$   | 5.2                  |
| $k_{on}^{PH+PIP}$                | $\mu\text{M}^{-1}\text{s}^{-1}$ | $10^{-8} — 10$   | 6.9                  |
| $K_d^{PH+PIP}$                   | $\mu\text{M}$                   | $1 — 100$        | 23                   |
| $k_{on}^{PH+PS}$                 | $\mu\text{M}^{-1}\text{s}^{-1}$ | $10^{-8} — 10$   | 2.0                  |
| $K_d^{PH+PS}$                    | $\mu\text{M}$                   | $0.1 — 1000$     | 51                   |
| $h$                              | nm                              | $1 — 100$        | 1                    |
| $\exp(-\Delta G_{coop} / k_B T)$ |                                 | $10^{-5} — 10^5$ | 5800                 |

**Table SI7.** Variable model parameters with allowable ranges and optimal values.

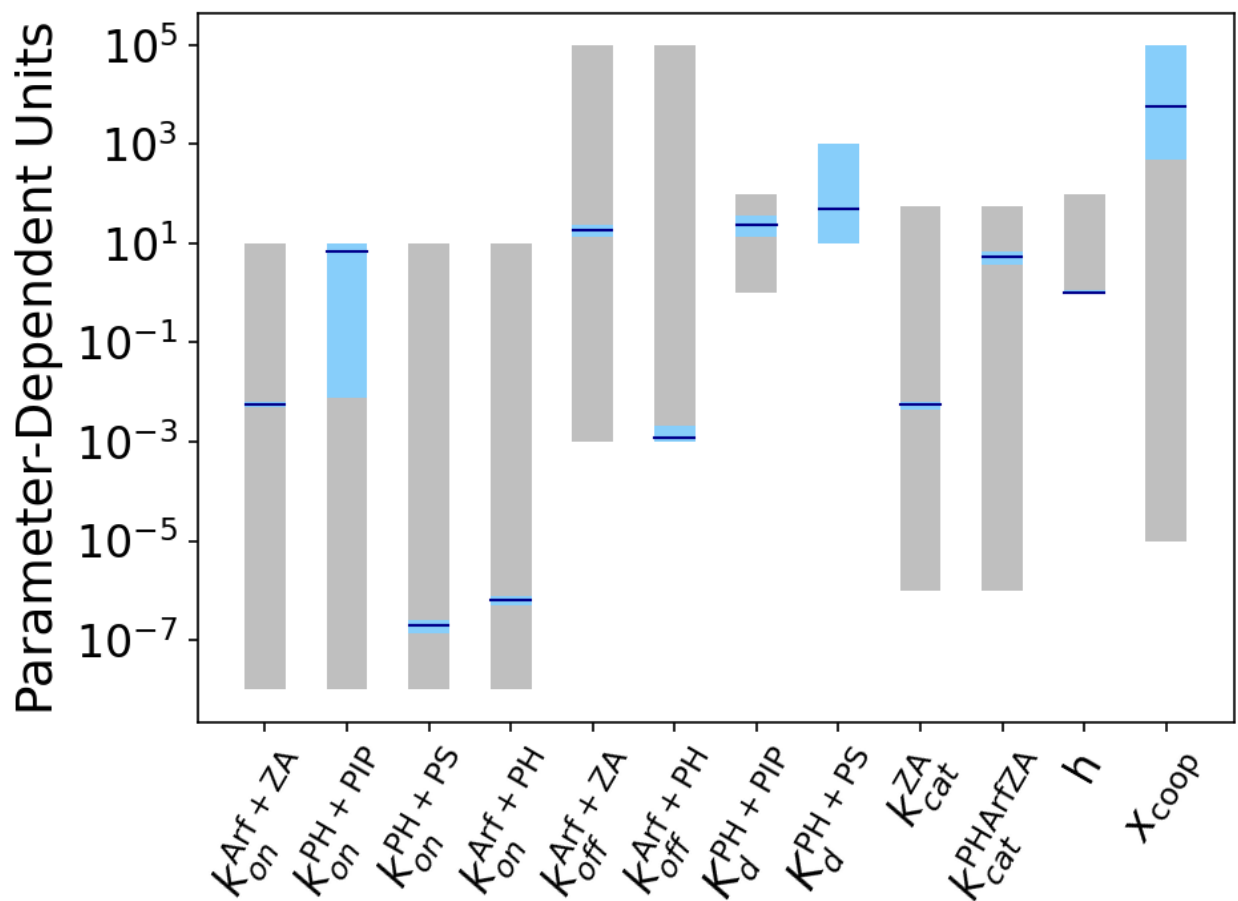

**Figure S19.** Parameter values and sensitivities for the optimal solution found by the genetic algorithm. Units for each parameter are given in column 2 of Table SI7. The overall optimal parameter set (lowest  $\chi^2$ , values shown in Table SI7) is shown by the dark blue horizontal lines. The light blue shading indicates the range of values for the parameter for which the  $\chi^2$  is within 10% of the optimal value. Grey shaded regions indicate allowed parameter ranges during optimization (column 3 of Table SI7). Parameter  $x_{\text{coop}} = \exp(-\Delta G_{\text{coop}} / k_{\text{B}}T)$ .



## **Supplementary References**

1. Bezanson, J., Edelman, A., Karpinski, S. & Shah, V. B. Julia: A Fresh Approach to Numerical Computing. SIAM Rev. 59, 65–98 (2017).
2. Rackauckas, C. & Nie, Q. DifferentialEquations.jl – A Performant and Feature-Rich Ecosystem for Solving Differential Equations in Julia. Journal of Open Research Software 5, (2017).
3. Art et al. Wildart/Evolutionary.Jl: V0.11.1. (Zenodo, 2022). doi:10.5281/zenodo.5851574.
4. Loman, T. E. et al. Catalyst: Fast and flexible modeling of reaction networks. PLOS Computational Biology 19, e1011530 (2023).
5. Wu, Y., Vendome, J., Shapiro, L., Ben-Shaul, A. & Honig, B. Transforming binding affinities from three dimensions to two with application to cadherin clustering. Nature 475, 510–513 (2011).
6. Jian, X. et al. Molecular Basis for Cooperative Binding of Anionic Phospholipids to the PH Domain of the Arf GAP ASAP1. Structure 23, 1977–1988 (2015).
7. Luo, R. et al. Kinetic analysis of GTP hydrolysis catalysed by the Arf1-GTP–ASAP1 complex. Biochemical Journal 402, 439–447 (2007).
